# Supplementary material
Source: Springer Nature journal article supplement (https://www.springermedizin.de/resource/supplementary/13012_2006_33_MOESM5_ESM.pdf/9629180)
Supplement: MOESM5 [file 9629180]

12 Study Sites

Stratification

6 Teaching

6 Community

Matched Pairing

2 T

2 T

2 T

2 C

2 C

2 C

Randomization

T<sub>c</sub>

T<sub>c</sub>

T<sub>c</sub>

C<sub>c</sub>

C<sub>c</sub>

C<sub>c</sub>

Control Sites

T<sub>i</sub>

T<sub>i</sub>

T<sub>i</sub>

C<sub>i</sub>

C<sub>i</sub>

C<sub>i</sub>

Intervention Sites
